# Supplementary material
Source: publisher figshare collection journal article supplement (https://acs.figshare.com/ndownloader/files/4665334)
Supplement: Supplementary file 1 [file 4665334]

data_mollyend
_publ_contact_author
;
Goran Bogdanovic
Anne Spasojevic-de Bire
;	
_publ_contact_author_email
;
goranb@vin.bg.ac.yu
anne.spasojevic@ecp.fr
;
loop_
    _publ_author_name
    _publ_author_footnote
    _publ_author_address
    "Novakovi\'c, Sladjana B." .
;
`Vin\<ca' Institute of Nuclear Sciences
Laboratory of Theoretical Physics and Condensed Matter Physics
PO Box 522
11001 Belgrade
Serbia 
;
    "Bogdanovi\'c, Goran A." .
;
`Vin\<ca' Institute of Nuclear Sciences
Laboratory of Theoretical Physics and Condensed Matter Physics
PO Box 522
11001 Belgrade
Serbia 
;
    "Bernar Fraisse" .
;
Laboratory SPMS, UMR 8580 CNRS - Ecole Centrale Paris,
92295 Chatenay-Malabry,
France
;
    "Ghermani, Nour Eddine" .
;
Physico-Chimie, Pharmacotechnie, Biopharmacie (PPB)
UMR CNRS 8612,
Universit\'e Paris XI
Facult\'e de Pharmacie
5 rue J. B. Cl\'ement
92296 Ch\^atenay-Malabry Cedex
France
;
    "Bouhmaida, Nouzha" .
; 
Laboratoire des Sciences des Mat\'eriaux, LSM, 
Universit\'e Cadi Ayyad, Facult\'e des Sciences Semlalia, 
Boulevard Prince Moulay Abdallah, 
BP 2390, 40000 Marrakech, 
Morocco
;
    "Spasojevi\'c-de Bir\'e, Anne" .
;
Laboratory SPMS, UMR 8580 CNRS - Ecole Centrale Paris,
92295 Chatenay-Malabry,
France
;
_journal_name_full
;
Journal of Physical Chemistry A
;
_audit_creation_method            SHELXL-97
_chemical_name_systematic
;
 ?
;
_chemical_name_common             ?
_chemical_melting_point           ?
_chemical_formula_moiety 
'C2 H10 N6 S2 Zn, 2(N O3)'         
_chemical_formula_sum
 'C2 H10 N8 O6 S2 Zn'
_chemical_formula_weight          371.67
 
loop_
 _atom_type_symbol
 _atom_type_description
 _atom_type_scat_dispersion_real
 _atom_type_scat_dispersion_imag
 _atom_type_scat_source
 'C'  'C'   0.0033   0.0016
 'International Tables Vol C Tables 4.2.6.8 and 6.1.1.4'
 'H'  'H'   0.0000   0.0000
 'International Tables Vol C Tables 4.2.6.8 and 6.1.1.4'
 'N'  'N'   0.0061   0.0033
 'International Tables Vol C Tables 4.2.6.8 and 6.1.1.4'
 'O'  'O'   0.0106   0.0060
 'International Tables Vol C Tables 4.2.6.8 and 6.1.1.4'
 'S'  'S'   0.1246   0.1234
 'International Tables Vol C Tables 4.2.6.8 and 6.1.1.4'
 'Zn'  'Zn'   0.2839   1.4301
 'International Tables Vol C Tables 4.2.6.8 and 6.1.1.4'
 
_symmetry_cell_setting            monoclinic
_symmetry_space_group_name_H-M    C2/c
 
loop_
 _symmetry_equiv_pos_as_xyz
 'x, y, z'
 '-x, y, -z+1/2'
 'x+1/2, y+1/2, z'
 '-x+1/2, y+1/2, -z+1/2'
 '-x, -y, -z'
 'x, -y, z-1/2'
 '-x+1/2, -y+1/2, -z'
 'x+1/2, -y+1/2, z-1/2'
 
_cell_length_a                    10.9541(3)
_cell_length_b                    7.5673(2)
_cell_length_c                    14.1753(3)
_cell_angle_alpha                 90.000
_cell_angle_beta                  101.630(2)
_cell_angle_gamma                 90.000
_cell_volume                      1150.91(5)
_cell_formula_units_Z             4
_cell_measurement_temperature     100(2)
_cell_measurement_reflns_used     ?
_cell_measurement_theta_min       ?
_cell_measurement_theta_max       ?
 
_exptl_crystal_description        ?
_exptl_crystal_colour             ?
_exptl_crystal_size_max           0.47
_exptl_crystal_size_mid           0.38
_exptl_crystal_size_min           0.30
_exptl_crystal_density_meas       ?
_exptl_crystal_density_diffrn     2.146
_exptl_crystal_density_method     'not measured'
_exptl_crystal_F_000              752
_exptl_absorpt_coefficient_mu     2.540
_exptl_absorpt_correction_type    ?
_exptl_absorpt_correction_T_min   ?
_exptl_absorpt_correction_T_max   ?
_exptl_absorpt_process_details    ?
 
_exptl_special_details
;
 ?
;
 
_diffrn_ambient_temperature       100(2)
_diffrn_radiation_wavelength      0.71073
_diffrn_radiation_type            MoK\a
_diffrn_radiation_source          'fine-focus sealed tube'
_diffrn_radiation_monochromator   graphite
_diffrn_measurement_device_type   ?
_diffrn_measurement_method        ?
_diffrn_detector_area_resol_mean  ?
_diffrn_standards_number          ?
_diffrn_standards_interval_count  ?
_diffrn_standards_interval_time   ?
_diffrn_standards_decay_%         ?
_diffrn_reflns_number             7574
_diffrn_reflns_av_R_equivalents   0.0000
_diffrn_reflns_av_sigmaI/netI     0.0238
_diffrn_reflns_limit_h_min        -25
_diffrn_reflns_limit_h_max        24
_diffrn_reflns_limit_k_min        -17
_diffrn_reflns_limit_k_max        17
_diffrn_reflns_limit_l_min        -33
_diffrn_reflns_limit_l_max        33
_diffrn_reflns_theta_min          2.93
_diffrn_reflns_theta_max          56.62
_reflns_number_total              7574
_reflns_number_gt                 5904
_reflns_threshold_expression      >3sigma(I)
 
_computing_data_collection        ?
_computing_cell_refinement        ?
_computing_data_reduction         ?
_computing_structure_solution     ?
_computing_structure_refinement   'SHELXL-97 (Sheldrick, 1997)'
_computing_molecular_graphics     ?
_computing_publication_material   ?
 
_refine_special_details
;
 Refinement of F^2^ against ALL reflections.  The weighted R-factor wR and
 goodness of fit S are based on F^2^, conventional R-factors R are based
 on F, with F set to zero for negative F^2^. The threshold expression of
 F^2^ > 2sigma(F^2^) is used only for calculating R-factors(gt) etc. and is
 not relevant to the choice of reflections for refinement.  R-factors based
 on F^2^ are statistically about twice as large as those based on F, and R-
 factors based on ALL data will be even larger.
;
 
_refine_ls_structure_factor_coef  Fsqd
_refine_ls_matrix_type            full
_refine_ls_weighting_scheme       calc
_refine_ls_weighting_details
 'calc w=1/[\s^2^(Fo^2^)+(0.0282P)^2^+0.0000P] where P=(Fo^2^+2Fc^2^)/3'
_atom_sites_solution_primary      direct
_atom_sites_solution_secondary    difmap
_atom_sites_solution_hydrogens    geom
_refine_ls_hydrogen_treatment     mixed
_refine_ls_extinction_method      none
_refine_ls_extinction_coef        ?
_refine_ls_number_reflns          5904
_refine_ls_number_parameters      258
_refine_ls_number_restraints      0
_refine_ls_R_factor_all           0.0189
_refine_ls_R_factor_gt            0.0189
_refine_ls_wR_factor_ref          0.0440
_refine_ls_wR_factor_gt           0.0440
_refine_ls_goodness_of_fit_ref    1.030
_refine_ls_restrained_S_all       1.030
_refine_ls_shift/su_max           0.003
_refine_ls_shift/su_mean          0.000
 
loop_
 _atom_site_label
 _atom_site_type_symbol
 _atom_site_fract_x
 _atom_site_fract_y
 _atom_site_fract_z
 _atom_site_U_iso_or_equiv
 _atom_site_adp_type
 _atom_site_occupancy
 _atom_site_symmetry_multiplicity
 _atom_site_calc_flag
 _atom_site_refinement_flags
 _atom_site_disorder_assembly
 _atom_site_disorder_group
Zn1 Zn 0.5000 0.16713(1) 0.7500 0.00922(1) Uani 1 2 d S . .
S1 S 0.55857(1) 0.28277(1) 0.61841(2) 0.00879(1) Uani 1 1 d . . .
O1 O 0.16668(3) -0.10002(5) 0.41798(2) 0.01261(4) Uani 1 1 d . . .
O2 O 0.22035(3) 0.08023(4) 0.31357(2) 0.01212(4) Uani 1 1 d . . .
O3 O 0.13815(4) -0.17230(4) 0.26716(3) 0.0145(4) Uani 1 1 d . . .
N1 N 0.35667(2) 0.03320(3) 0.65767(2) 0.01002(3) Uani 1 1 d . . .
N2 N 0.35293(3) 0.08165(4) 0.56097(2) 0.00942(3) Uani 1 1 d . . .
N3 N 0.42828(3) 0.22683(5) 0.44366(2) 0.01133(4) Uani 1 1 d . . .
N4 N 0.17445(3) -0.06438(4) 0.33284(2) 0.00922(3) Uani 1 1 d . . .
C1 C 0.43834(3) 0.19023(4) 0.53650(2) 0.00769(3) Uani 1 1 d . . .
H1a H 0.3605(9) -0.0981(2) 0.6641(7) 0.0249(3) Uiso 1 1 d . . .
H1b H 0.2744(9) 0.0753(12) 0.6749(7) 0.0266(4) Uiso 1 1 d . . .
H3a H 0.3566(10) 0.1778(13) 0.3950(8) 0.0218(3) Uiso 1 1 d . . .
H3b H 0.4896(9) 0.3071(14) 0.4244(8) 0.0246(3) Uiso 1 1 d . . .
H2 H 0.2893(9) 0.0218(14) 0.5117(7) 0.0241(4) Uiso 1 1 d . . . 
loop_
 _atom_site_aniso_label
 _atom_site_aniso_U_11
 _atom_site_aniso_U_22
 _atom_site_aniso_U_33
 _atom_site_aniso_U_12
 _atom_site_aniso_U_13
 _atom_site_aniso_U_23
Zn1 0.012694(2) 0.010747(2) 0.005948(2) 0.000 0.001003(1) 0.000
S1  0.008487(3) 0.011635(3) 0.007811(3) -0.002005(3) .000744(2) -0.00204(2)
O2 0.01417(9) 0.01122(8) 0.01217(8) -0.00325(6) 0.00119(7)  0.00159(2) 
O3 0.02072(12) 0.01115(8) 0.01249(9) -0.00134(7) 0.00086(8) -0.0011(8)
O1 0.01331(9) 0.01706(10) 0.00966(7) 0.00223(7) 0.00323(6) 0.00177(7)
N2 0.01056(8) 0.01170(8) 0.00765(7) -0.00311(6) 0.00120(6) -0.00027(6)
N4 0.00903(7) 0.00868(7) 0.00853(7) -0.00008(6) 0.00172(5) -0.00003(5)
N1 0.01278(9) 0.01060(8) 0.00886(7) -0.00233(6) 0.00235(6) 0.00085(6)
N3 0.01281(9) 0.01581(10) 0.00710(7) -0.00277(7) 0.00124(6) 0.00081(7)
C1 0.00854(8) 0.00938(8) 0.00705(7) -0.00034(6) 0.00125(6) -0.00002(6)
 
_geom_special_details
;
 All esds (except the esd in the dihedral angle between two l.s. planes)
 are estimated using the full covariance matrix.  The cell esds are taken
 into account individually in the estimation of esds in distances, angles
 and torsion angles; correlations between esds in cell parameters are only
 used when they are defined by crystal symmetry.  An approximate (isotropic)
 treatment of cell esds is used for estimating esds involving l.s. planes.
;
 
loop_
 _geom_bond_atom_site_label_1
 _geom_bond_atom_site_label_2
 _geom_bond_distance
 _geom_bond_site_symmetry_2
 _geom_bond_publ_flag
Zn1 N1 2.0918(2) 2_656 ?
Zn1 N1 2.0918(2) . ?
Zn1 S1 2.2670(3) . ?
Zn1 S1 2.2670(3) 2_656 ?
S1 C1  1.7194(2) . ?
O1 N4  1.2561(2) . ?
O2 N4  1.2568(3) . ?
O3 N4  1.2418(3) . ?
N2 C1  1.3419(3) . ?
N1 N2  1.4114(2) . ?
N3 C1  1.3274(3) . ?
 
loop_
 _geom_angle_atom_site_label_1
 _geom_angle_atom_site_label_2
 _geom_angle_atom_site_label_3
 _geom_angle
 _geom_angle_site_symmetry_1
 _geom_angle_site_symmetry_3
 _geom_angle_publ_flag
N1 Zn1 N1 122.06(1) 2_656 . ?
N1 Zn1 S1 113.62(1) 2_656 . ?
N1 Zn1 S1 88.47(1) . . ?
N1 Zn1 S1 88.47(1) 2_656 2_656 ?
N1 Zn1 S1 113.62(1) . 2_656 ?
S1 Zn1 S1 134.60(3) . 2_656 ?
C1 S1 Zn1 95.34(1) . . ?
C1 N2 N1 121.64(3) . . ?
O1 N4 O2 120.20(4) . . ?
O1 N4 O3 120.37(3) . . ?
O2 N4 O3 119.42(3) . . ?
N2 N1 Zn1 110.67(2) . . ?
N2 C1 N3 117.45(3) . . ?
N3 C1 S1 118.94(3) . . ?
N2 C1 S1 123.61(3) . . ?
 
_diffrn_measured_fraction_theta_max    0.967
_diffrn_reflns_theta_full              56.62
_diffrn_measured_fraction_theta_full   0.967
_refine_diff_density_max    0.404
_refine_diff_density_min   -0.843
_refine_diff_density_rms    0.172
